# Supplementary material for: Diisocyanates as novel molecular binders for monolayer assembly of zeolite crystals on glassElectronic supplementary information (ESI) available: experimental details. See http://www.rsc.org/suppdata/cc/b2/b205046c/
Source: Royal Society of Chemistry journal article supplement (doi:10.1039/b205046c), 2002-07-23
Supplement: b205046c.doc [file b205046c.doc]

**Supplementary Material (ESI) for Chemical Communications**

**This journal is © The Royal Society of Chemistry 2002**

Diisocyanates as novel molecular binders for monolayer assembly of zeolite crystals on glass

Yu Sung Chun, Kwang Ha, Yun-Jo Lee, Jin Seok Lee, Hyun Sung Kim, Yong Soo Park and Kyung Byung Yoon*

Center for Microcrystal Assembly and Department of Chemistry, Sogang University, Seoul 121-742, Korea.

E-mail: yoonkb@ccs.sogang.ac.kr

**Experimental**

**Materials.** Zeolite–A and ZSM-5 were synthesized according to the literature procedures.1 The average sizes of zeolites used in this study were ~ 0.5 x 0.5 x 0.5 m3 (zeolite-A) and 2.5 x 1.5 x 0.7 m3 (ZSM-5). The synthetic templates were not removed from zeolite crystals prior to assembly. All the DICs whose structures are shown in ESI-Figure 1 were purchased from Aldrich, and used as received. Cover glasses (18 x 18 mm2) were purchased from Marienfeld and dipped into an acid bath consisting of sulfuric acid and ammonium persulfate for 1 h to remove organic contaminants on the surfaces. The glass plates were washed with copious amounts of deionized water and dried at 120 °C for 3 h and cooled to room temperature before use.

**Preparation of Glass Plates Coated with DICs (G/DIC).** Typically, 10 pieces of cover glass were mounted on a Teflon support and the support was immersed into a dry toluene solution (30 mL, 0.1 M) of DIC-4, and the solution was refluxed under argon for 3 h. After cooling to room temperature, the DIC-4-tethering glass plates (G/DIC-4) were removed from the reaction flask and washed with copious amounts of dry toluene. Since the isocyanate gorups on G/DIC-4 are reactive to the moisture in the atmosphere, they were used immediately after preparation.

**Preparation of Glass Plates Successively Coated with DIC-4, Polyethylenimine, and DIC-4 (G/DIC-4/PEI/DIC-4), and Glass Plates Coated with Three Layers DIC-4/PEI Followed by a Layer of DIC-4 [G/(DIC-4/PEI)3/DIC-4].** Independently, a Teflon support mounting 10 pieces of G/DIC-4 was immersed into a toluene solution (30 mL) of polyethylenimine (PEI) (0.1 g) and the heterogeneous mixture was refluxed for 3 h to induce urea linkages between the free isocyanate groups and the amino groups in PEI. The free PEI polymers might have physisorbed on the glass plates tethering DIC-4 and PEI (G/DIC-4/PEI) were removed by repeatedly washing the glass plates in boiling ethanol. The glass plates (G/DIC-4/PEI) were treated once again with DIC-4 in boiling toluene to prepare glass plates having free terminal isocyanate groups of DIC-4 over the crosslinked polyurea [G/DIC-4/PEI/DIC-4]. The glass plates coated with three layers DIC-4/PEI followed by a layer of DIC-4 [G/(DIC-4/PEI)3/DIC-4] were similarly prepared from G/DIC-4 by repetition of the cycle of the sequential treatment of the glass plates with PEI and DIC-4 for 3 times.

**Monolayer Assembly of Zeolite Crystals.** A Teflon support mounting 10 pieces of each type of DIC-tethering glass plate was immersed into a toluene suspension (30 mL) of either zeolite-A or ZSM-5 crystals (30 mg) and the mixture was refluxed for 3 h. The zeolite-coated opaque glass plates were then removed from the reaction flask, and sonicated in toluene for 30 s to remove physisorbed zeolite crystals by employing an ultrasonic bath equipped with two ultrasound generators (28 kHz and 95 watts each). The SEM images of zeolite-coated glass plates were obtained from FE-SEM (Hitachi S-4300) at an acceleration voltage of 20 kV. On top of the samples, platinum/palladium alloy (in the ratio of 8 to 2) was deposited with thickness of about 15 nm before SEM analysis.

**Sonication-induced Detachment Test.**2  Typically, a zeolite-binding glass plate was placed in a vial (i.d. = 2.4 cm) filled with 10 mL of toluene. The vial was then placed in an ultrasonic cleaning bath (22 x 12 x 11 cm3) filled with 1.5 L of water, 3 cm above one of the two ultrasound generators (28 kHz, 95 W each) mounted under the bath. A rack was built into the bath to place vials always in the same position. The water inside the bath circulated through an external heat exchanger to keep the temperature constant (~25 °C). After each period of sonication, the glass plate was removed from the vial and dried in an oven (120 °C) for 3 min, and the weight was measured on a microbalance. For each run, fresh toluene was charged into the vial. The sonication period was 5 min. After sonication for 30 min (20 min for DIC-T and DIC-I), the remaining zeolite crystals were completely removed from the glass plate by rubbing on a soft cloth, and the weight of the zeolite-free glass plate was measured. The total weight of pure zeolite crystals bound to the glass plate was deduced from the initial weight of the zeolite-binding glass plate that was measured after sonication for 30 s to remove physisorbed crystals. Five independet runs were made and the resulting data were averaged. Since each glass plate binds about 250 µg of zeolite crystals, a microbalance is sensitive enough to detect the loss of zeolite crystals.

**ESI-Figure 1**. The structures of diisocyanate compounds (DICs) employed in this study.

**References**

1. (a) G. Zhu, S. Qui, J. Yu, Y. Sakamoto, F. Xiao, R. Xu and O. Terasaki, *Chem. Mater*., 1998, **10**, 1483; (b) R. J. Argauer and G. R. Landolt, *US Patent 3702886*, 1972; (c) R. W. Grose and E. M. Flanigen, *US Patent 4061724*, 1977.
2. A. Kulak, Y. S. Park, Y.-J. Lee, Y. S. Chun, K. Ha and K. B. Yoon, *J. Am. Chem. Soc*., 2000, **122**, 9308.
